# Supplementary material for: Prediction of Long-Term Outcomes in ST-Elevation Myocardial Infarction and Non-ST Elevation Myocardial Infarction with and without Creatinine Kinase Elevation—Post-Hoc Analysis of the J-MINUET Study
Source: PubMed Central journal article supplement (PMC7463547; doi:10.3390/jcm9082667), 2020-08-18
Supplement: jcm-09-02667-s001.pdf [file jcm-09-02667-s001.pdf]

## Supplementary Materials

Table S1. All of the baseline variables for demographic and clinical characteristics evaluated in the J-MINUET study.

| Age; yr                                                           | Stent; yes/no                                                         | Blood glucose; mg/dL                             |
|-------------------------------------------------------------------|-----------------------------------------------------------------------|--------------------------------------------------|
| Gender; men/women                                                 | Onset-to -balloon time; min                                           | HbA1c %                                          |
| Hight; cm                                                         | Stent size; mm                                                        | Na; mEq/L                                        |
| Weight; kg                                                        | Stent length; mm                                                      | K; mEq/L                                         |
| Onset-to-door time; min                                           | Final TIMI grade; 0/1/2/3                                             | BNP; pg/dL                                       |
| Systolic blood pressure; mmHg                                     | Final TIMI 3; yes/no                                                  | NTpro-BNP; pg/dL                                 |
| Heart rate; /min                                                  | Ventricular tachycardia/ventricular fibrillation at admission; yes/no | Other laboratory findings at any time            |
| Killip class; I/II/III/IV                                         | Atrial fibrillation at admission; yes/no                              | Fasting blood glucose; mg/dL                     |
| Type of myocardial infarction; II/I                               | Typical symptoms; yes/no                                              | Fasting IRI uU/mL                                |
| Past history                                                      | Transport; emergency car/transfer/on foot/in-hospital onset           | EPA/AA ratio                                     |
| Hypertension; yes/no                                              | Referral physicians; yes/no                                           | Proteinuria positive; yes/no                     |
| Diabetes (HbA1c $\geq$ 6.5); yes/no                               | Intra-aortic balloon pumping; yes/no                                  | Baseline medications prior to admission          |
| Dyslipidemia; yes/no                                              | Percutaneous cardio-pulmonary support; yes/no                         | Dual antiplatelet therapy; yes/no                |
| Chronic kidney disease (eGFR<60); yes/no                          | Acute kidney injury; yes/no                                           | Antiplatelet drugs; yes/no                       |
| Hemodialysis; yes/no                                              | cTn measurement at admission; yes/no                                  | Aspirin; yes/no                                  |
| Smoking habit; yes/no                                             | cTn positive; yes/no                                                  | P2Y12 inhibitors; yes/no                         |
| Myocardial infarction; yes/no                                     | Tn measurement; yes/no                                                | Anticoagulant drugs; yes/no                      |
| Coronary angioplasty; yes/no                                      | Tn positive; yes/no                                                   | Direct anticoagulant drugs; yes/no               |
| Coronary artery bypass surgery; yes/no                            | cTn measurement in hospital; yes/no                                   | Calcium channel blockers                         |
| Atrial fibrillation; yes/no                                       | cTn positive in hospital; yes/no                                      | Beta blockers; yes/no                            |
| Stroke; yes/no                                                    | cTn type; TnI /TnT                                                    | Nitrates; yes/no                                 |
| Ischemic stroke; yes/no                                           | CK> 2 in hospital; yes/no                                             | Nicorandil; yes/no                               |
| Peripheral artery disease; yes/no                                 | maxCK; IU/L                                                           | Angiotensin converting enzyme inhibitors; yes/no |
| Atherothrombosis; yes/no                                          | Other laboratory findings at admission                                | Angiotensin receptor blockers; yes/no            |
| Drug eluting stent; yes/no                                        | WBC; /mm <sup>3</sup>                                                 | Aldosterone antagonists; yes/no                  |
| Bare metal stent; yes/no                                          | WBC at admission 10000; yes/no                                        | Diuretics; yes/no                                |
| Coronary angioplasty (infarct-related artery); yes/no             | RBC; /mm <sup>3</sup>                                                 | Lipid lowering drugs; yes/no                     |
| Coronary angioplasty (infarct non-related artery); yes/no         | Hemoglobin; mg/dL                                                     | Statins; yes/no                                  |
| Urgent coronary angiography; yes/no                               | Hematocrit; %                                                         | Antidiabetic drugs; yes/no                       |
| Affected vessel number; 0/1/2/3                                   | Platelet; /mm <sup>3</sup>                                            | Insulin; yes/no                                  |
| Multi-vessel disease; yes/no                                      | BUN; mg/dL                                                            | Sulphonylurea drugs; yes/no                      |
| Left anterior descending artery as infarct-related artery; yes/no | Creatinine; mg/dL                                                     | Pioglitazone; yes/no                             |
| Initial TIMI grade; 0/1/2/3                                       | eGFR; mL/min/1.73m <sup>2</sup>                                       | Metformin; yes/no                                |
| Initial TIMI 2 or 3; yes/no                                       | Uric acid; mg/dL                                                      | Alpha galactosidase inhibitors; yes/no           |
| Urgent revascularization                                          | Uric acid >7; yes/no                                                  | Dipeptidyl peptidase-4 inhibitors; yes/no        |
| Coronary artery bypass surgery; yes/no                            | Total cholesterol; mg/dL                                              | Hypouricemic drugs; yes/no                       |
| Coronary angioplasty; yes/no                                      | Triglyceride; mg/dL                                                   | Proton pump inhibitors; yes/no                   |
| Door-to-balloon time; min                                         | HDL-cholesterol; mg/dL                                                | H2 blockers; yes/no                              |
| Door-to-balloon time<90min; yes/no                                | LDL-cholesterol; mg/dL                                                |                                                  |

HbA1c; hemoglobin A1c; TIMI, Thrombolysis In Myocardial Infarction, cTn, cardiac troponin; Tn, troponin; CK, creatine kinase; WBC, white blood cell; RBC, red blood cell; BUN, blood urea nitrogen; eGFR, estimated glomerular filtration rate; HDL, high-density lipoprotein; LDL, low-density lipoprotein; BNP, brain natriuretic peptide; NTpro-BNP, N-terminal pro-brain natriuretic peptide; EPA, eicosapentaenoic acid; AA, arachidonic acid, H2, histamine 2

**Table S2.** Baseline characteristics of the study patients enrolled in J-MINUET.

|                                    | Total (n = 3283) | STEMI (n = 2262) | NSTEMI (n = 1021) | NSTEMI<br>NSTEMI+CK(n = 563) | NSTEMI-CK(n =458) |
|------------------------------------|------------------|------------------|-------------------|------------------------------|-------------------|
| Age (years)                        | 69 (61–78)       | 68 (60–77)       | 72 (63–80)        | 71 (62–80)                   | 73 (63–80)        |
| Male                               | 75.2%            | 76.8%            | 71.8%             | 72.3%                        | 71.2%             |
| Concomitant diseases               |                  |                  |                   |                              |                   |
| Hypertension                       | 66.5%            | 63.4%            | 73.2%             | 70.3%                        | 76.8%             |
| Diabetes                           | 36.4%            | 35.0%            | 39.5%             | 39.8%                        | 39.1%             |
| Dyslipidemia                       | 51.9%            | 49.9%            | 56.4%             | 53.9%                        | 59.4%             |
| CKD                                | 44.8%            | 41.9%            | 51.1%             | 50.1%                        | 52.4%             |
| Current smoking                    | 34.0%            | 37.3%            | 26.9%             | 26.9%                        | 26.9%             |
| Previous history                   |                  |                  |                   |                              |                   |
| Previous MI                        | 12.1%            | 9.3%             | 18.4%             | 16.0%                        | 21.2%             |
| Previous PCI                       | 15.3%            | 11.2%            | 24.4%             | 21.1%                        | 28.3%             |
| Previous CABG                      | 2.9%             | 1.8%             | 5.3%              | 4.2%                         | 6.6%              |
| Atrial fibrillation                | 6.0%             | 5.5%             | 7.2%              | 6.4%                         | 8.2%              |
| Stroke                             | 11.3%            | 10.4%            | 13.4%             | 13.5%                        | 13.3%             |
| PAD                                | 4.6%             | 3.2%             | 7.8%              | 7.5%                         | 8.2%              |
| Systolic blood pressure (mmHg)     | 138 (118–160)    | 135 (114–157)    | 144 (124–164)     | 140 (120–160)                | 150 (130–170)     |
| Heart rate (beats/min)             | 77 (65–90)       | 77 (64–90)       | 78 (67–92)        | 80 (67–96)                   | 77 (66–90)        |
| Killip classification              |                  |                  |                   |                              |                   |
| Class I                            | 75.6%            | 74.4%            | 78.3%             | 71.0%                        | 87.1%             |
| Class II                           | 9.3%             | 9.5%             | 8.8%              | 9.7%                         | 7.7%              |
| Class III                          | 5.4%             | 5.4%             | 6.3%              | 8.8%                         | 3.3%              |
| Class IV                           | 9.7%             | 11.1%            | 6.6%              | 10.4%                        | 2.0%              |
| Time from onset to admission (min) | 154 (70–390)     | 140 (66–334)     | 195 (79–546)      | 215 (84–513)                 | 180 (75–557)      |
| Type 2 MI                          | 5.2%             | 3.0%             | 10.0%             | 7.0%                         | 13.6%             |
| Urgent coronary angiography        | 93.1%            | 96.9%            | 84.7%             | 88.6%                        | 79.9%             |
| Radial approach                    | 32.1%            | 27.7%            | 43.0%             | 32.9%                        | 56.7%             |
| LAD as the infarct artery          | 44.5%            | 45.4%            | 42.4%             | 38.8%                        | 47.6%             |
| Initial TIMI 0/1 flow              | 60.4%            | 70.5%            | 34.7%             | 48.9%                        | 14.9%             |
| Multivessel disease                | 43.7%            | 41.5%            | 49.1%             | 53.1%                        | 43.7%             |
| Primary PCI                        | 85.1%            | 93.1%            | 67.4%             | 72.6%                        | 60.8%             |
| Door-to-balloon time (min)         | 75 (52–121)      | 66 (49–92)       | 137 (88–286)      | 125 (80–236)                 | 171 (100–399)     |
| Stent use†                         | 90.6%            | 90.7%            | 90.5%             | 89.3%                        | 92.1%             |
| DES use‡                           | 63.2%            | 59.6%            | 74.3%             | 71.2%                        | 78.9%             |
| Final TIMI 3 flow                  | 91.8%            | 91.0%            | 94.3%             | 92.1%                        | 97.4%             |
| Urgent CABG                        | 2.0%             | 1.1%             | 4.2%              | 6.0%                         | 2.0%              |
| Max CK (IU/L)                      | 1447 (518–3,178) | 2017 (927–3,848) | 505 (181–1,237)   | 1151 (702–2,076)             | 161 (101–254)     |

Data given as % or median (25–75th percentile). CABG, coronary artery bypass graft; CK, creatine kinase; CKD, chronic kidney disease; J MINUET, Japanese Registry of Acute Myocardial Infarction Diagnosed by Universal Definition; LAD, left anterior descending artery; MI, myocardial infarction; NSTEMI, non-STEMI; PAD, peripheral arterial disease; PCI, percutaneous coronary intervention; STEMI, ST-segment elevation myocardial infarction; TIMI, Thrombolysis in Myocardial Infarction.
